# Supplementary material for: Regenerative Superhydrophobic Coatings for Enhanced Performance and Durability of High-Voltage Electrical Insulators in Cold Climates
Source: MDPI journal article supplement (doi:10.3390/ma17071622), 2024-04-02
Supplement: s1 [file s1]

Article

# Regenerative Superhydrophobic Coatings for Enhanced Performance and Durability of High-Voltage Electrical Insulators in Cold Climates

Helya Khademsameni, Reza Jafari \*, Anahita Allahdini and Gelareh Momen

Department of Applied Sciences, University of Quebec in Chicoutimi (UQAC), 555 Boul de l'Université, Chicoutimi, QC G7H 2B1, Canada

\* Correspondence: rjafari@uqac.ca; Tel.: +1-418-545-5011 (ext. 5635)

## Supplementary Materials:

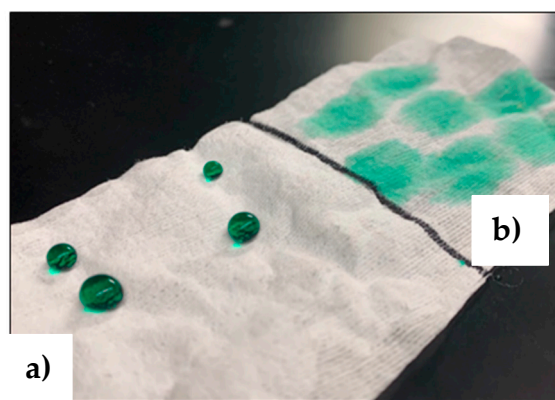

**Figure S1.** a) Demonstration of the developed SHP-REG coating applied to fabric and b) a pristine fabric lacking the coating.

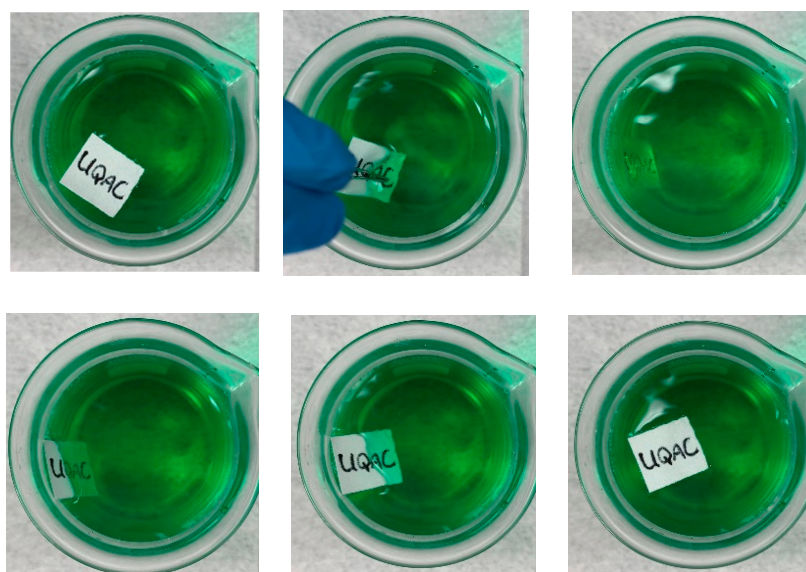

**Figure S2.** The water-repellent nature of the SHP-REG, which resulted in the coated fabric floating on the surface.

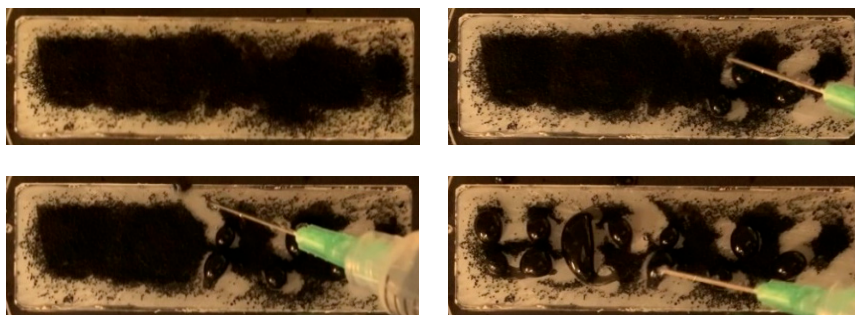

**Figure S3.** Contamination adhering to the pristine areas and the superhydrophobic areas able to be washed off by the water droplets.

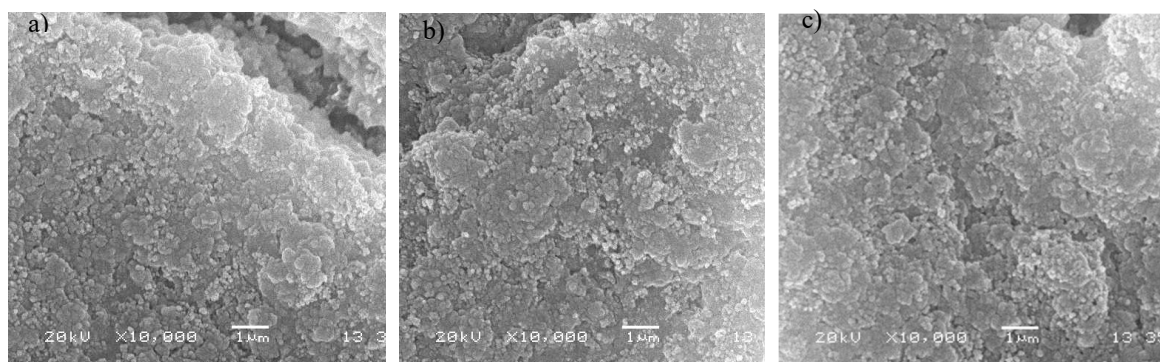

**Figure S4.** SEM images ( $\times 10,000$  magnification) of the developed regenerative superhydrophobic coating; a) pristine coating; b) after plasma deterioration with loss of superhydrophobicity; and c) after the regeneration of superhydrophobicity.
